# Supplementary material for: Atomic-scale origin of piezoelectricity in wurtzite ZnO
Source: Royal Society of Chemistry journal article supplement (doi:10.1039/c4cp06094f), 2015-01-01
Supplement: c4cp06094f1.pdf [file c4cp06094f1.pdf]

## Electronic Supplementary Information for:

### Atomic-scale origin of piezoelectricity in wurtzite ZnO

Jung-Hoon Lee,<sup>\*a</sup> Woo-Jin Lee,<sup>b</sup> Sung-Hoon Lee,<sup>c</sup> SeongMin Kim,<sup>b</sup> Sungjin Kim<sup>b</sup>

and Hyun Myung Jang<sup>\*a,d</sup>

*<sup>a</sup>Division of Advanced Materials Science (AMS) and Department of Materials Science and Engineering, Pohang University of Science and Technology (POSTECH),  
Pohang 790-784, Republic of Korea.*

*<sup>b</sup>Samsung Advanced Institute of Technology (SAIT), Suwon 443-803, Republic of Korea.*

*<sup>c</sup>Center for Artificial Low Dimensional Electronic Systems, Institute for Basic Science,  
Pohang 790-784, Republic of Korea.*

*<sup>d</sup>Department of Physics, Pohang University of Science and Technology (POSTECH),  
Pohang 790-784, Republic of Korea.*

\* To whom correspondence should be addressed. E-mail: [jhlee.david@gmail.com](mailto:jhlee.david@gmail.com) and [hmjang@postech.ac.kr](mailto:hmjang@postech.ac.kr)

## **(A) Atomic Positions**

**Table SI.** Comparison of the calculated ground-state atomic positions of the polar  $P6_3mc$  structure with the nonpolar  $P6_3/mmc$  structure of hexagonal ZnO. The unit-cell parameters obtained from the experiment are  $a = 3.2418 \text{ \AA}$  and  $c = 5.1877 \text{ \AA}$ .<sup>S1</sup>

| Space Group | Ion Type | Wyckoff Position | $x$    | $y$    | $z$    |
|-------------|----------|------------------|--------|--------|--------|
| $P6_3mc$    | Zn       | $2b$             | 0.3333 | 0.6667 | 0.0016 |
|             | O        | $2b$             | 0.3333 | 0.6667 | 0.3804 |
| $P6_3/mmc$  | Zn       | $2b$             | 0.3333 | 0.6667 | 0.8804 |
|             | O        | $2b$             | 0.3333 | 0.6667 | 0.3804 |

## **(B) Hybrid functional calculations**

### **(1) Total density of states (DOS)**

We have carefully examined the total DOS using the hybrid functionals of HSE.<sup>S2</sup> In order to reproduce the experimental band gap of wurtzite ZnO, the fraction of Hartree-Fock ( $\alpha$ ) is set to 0.35. At this value, the wurtzite ZnO has a direct band gap of 3.38 eV which is in good agreement with the experimental value.<sup>S3</sup> As shown in **Fig. S1**, the hybrid functionals significantly improve the band-gap prediction: 1.96 eV for the GGA+U method and 3.38 eV for the hybrid functionals.

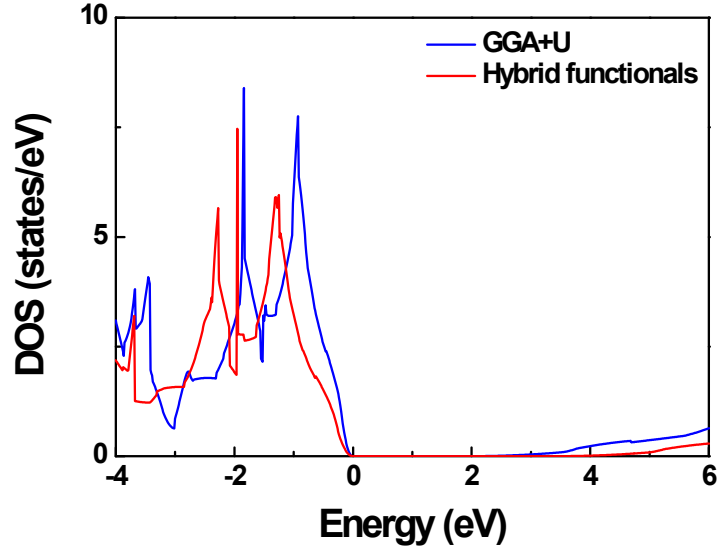

**Fig. S1** A comparison of the total DOS by the GGA+U method with the PDOS obtained by the hybrid functionals.

## (2) Orbital-resolved partial density of states (PDOS)

We have further examined the PDOS for various atomic orbitals using the hybrid functionals. In **Fig. S2**, we compare the orbital-resolved PDOS for  $O_A 2p_z$ ,  $Zn 4p_z$ , and  $Zn 3d_{z^2}$  of the  $P6_3/mmc$  structure with those of the polar  $P6_3mc$  structure. According to the PDOS results shown in **Fig. S2**, the hybrid functionals also indicate a strong overlapping of the  $Zn 4p_z$  orbital PDOS with the  $Zn 3d_{z^2}$  orbital PDOS (for the energy range between -2 and 0 eV below the valence-band top) in the polar  $P6_3mc$  phase.

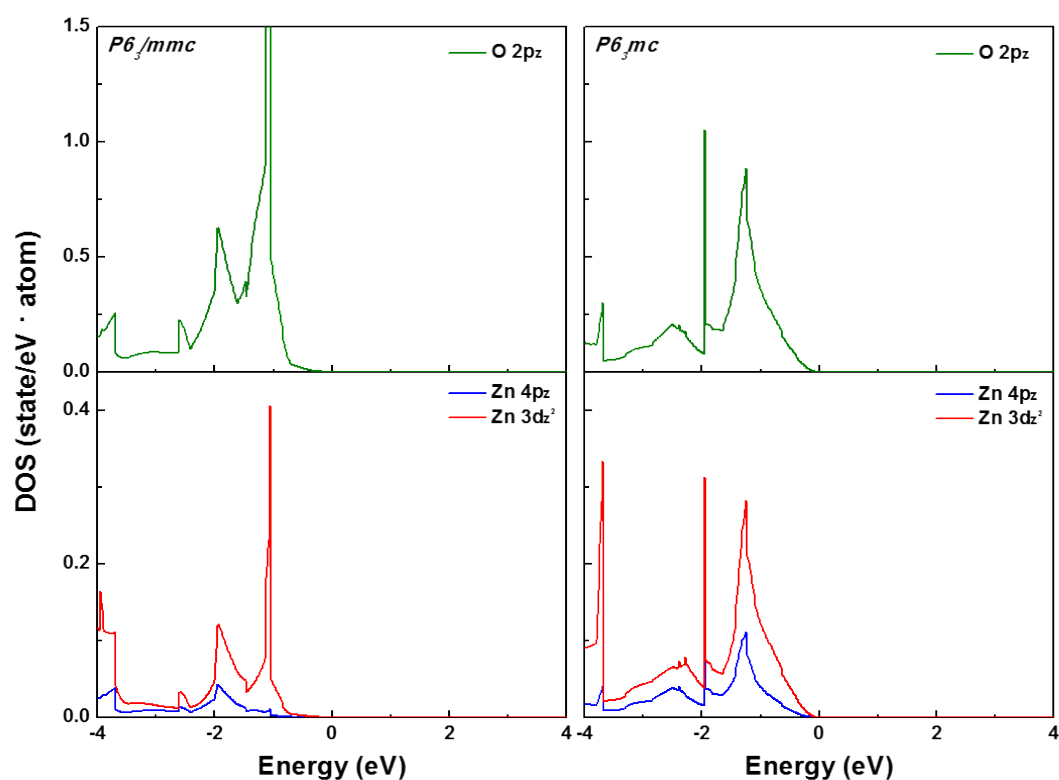

**Fig. S2** Orbital-resolved PDOS for Zn  $4p_z$ ,  $3d_z^2$ , and  $O_A 2p_z$  orbitals of the nonpolar  $P6_3/mmc$  structure with those of the polar  $P6_3mc$  structure.

## \* References

- S1 J. Albertsson, S. C. Abrahams and Å. Kvik, *Acta Cryst. B* 1989, **45**, 34-40.
- S2 J. Heyd, G. E. Scuseria and M. Ernzerhof, *J. Chem. Phys.*, 2006, **118**, 8207-8215.
- S3 Ü. Özgür, Ya. I. Alivov, C. Liu, A. Teke, M. A. Reshchikov, S. Doğan, V. Avrutin, S.-J. Cho and H. A. Morkoç, *J. Appl. Phys.*, 2005, **98**, 041301-1-041301-103.
